# Supplementary material
Source: PubMed Central journal article supplement (PMC6506404)
Supplement: NIHMS1521665-supplement-1.pdf [file NIHMS1521665-supplement-1.pdf]

Structure  
Supplemental Information

## **The plasticity of molecular interactions governs bacterial microcompartment shell assembly**

Basil J. Greber<sup>#</sup>, Markus Sutter<sup>#</sup>, Cheryl A. Kerfeld<sup>\*</sup>

<sup>#</sup> Equal contribution

<sup>\*</sup> Lead contact. E-mail: ckerfeld@lbl.gov

### **This PDF file includes:**

Figures S1 to S8  
Table S1

### **Other Supplemental Information for this manuscript includes the following:**

Videos S1 and S2

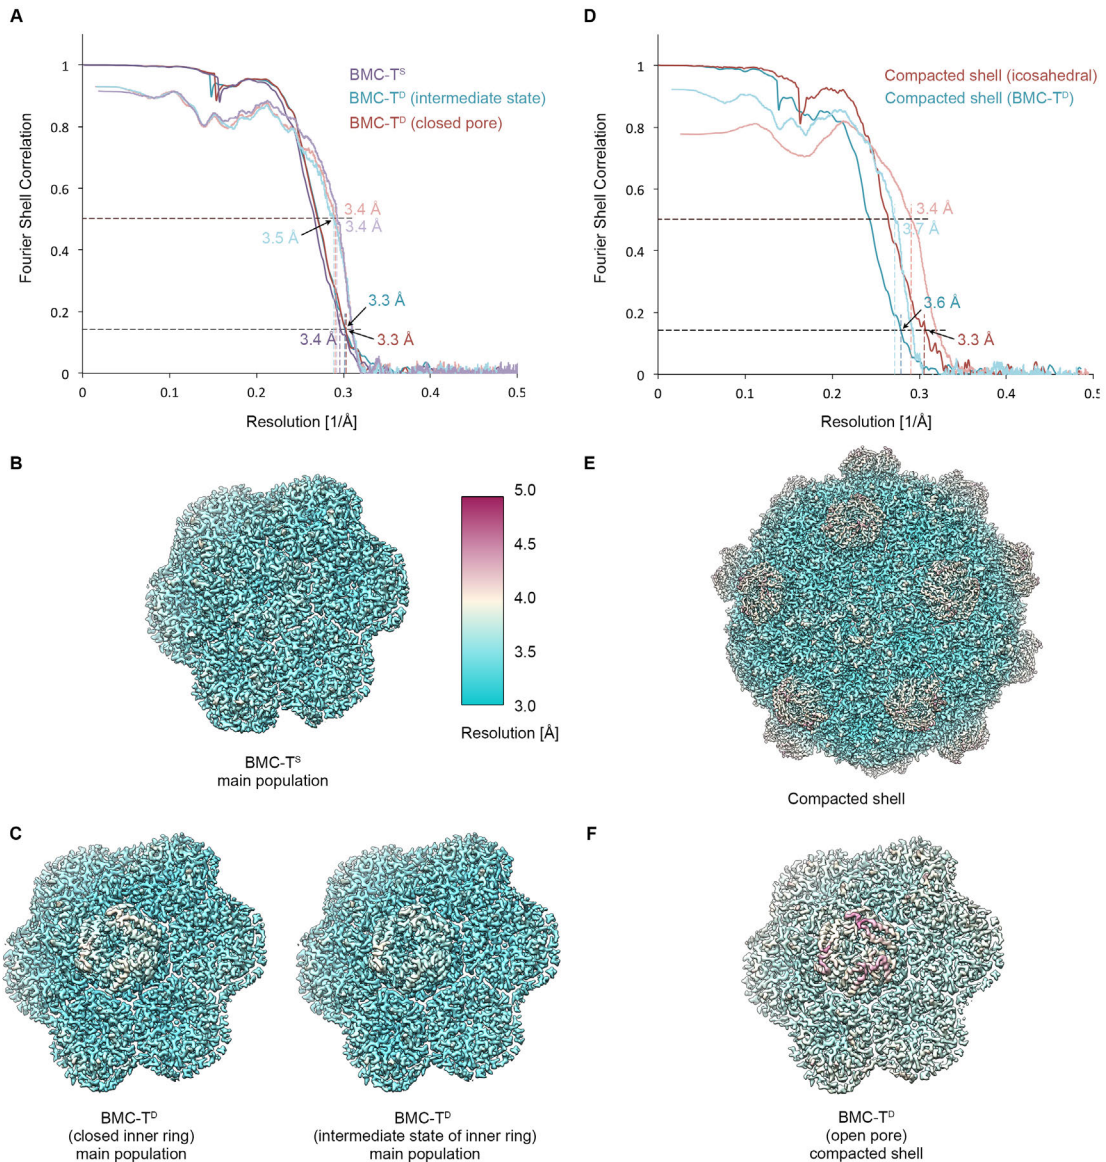

**Fig. S1, related to Figs. 5, 6, 8, STAR Methods. FSC and local resolution plots for the cryo-EM maps of BMC-T<sup>S</sup> and the maps sorted for conformational states of BMC-T<sup>D</sup> and the overall shell.**

(A) FSC curves computed from fully independent half-maps (gold standard refinement procedure; dark red, blue, and purple) and model vs. map FSC curves (in light red, blue, and purple) for coordinate models refined into the final maps. Resolution estimates are indicated (FSC = 0.143 criterion for FSC curves between half-maps, FSC = 0.5 criterion for model vs. map FSC curves (Rosenthal and Henderson, 2003)).

**(B)** Final post processed (sharpened) map of the BMC-T<sup>S</sup> reconstruction colored and filtered according to local resolution.

**(C)** As in (B), but for BMC-T<sup>D</sup> reconstruction from the main shell population (closed and intermediate inner pore conformations).

**(D)** As in (A), but for reconstructions based on the compacted shell population.

**(E)** As in (B), but for the icosahedral reconstruction of the compacted shell.

**(F)** As in (B), but for the reconstruction of BMC-T<sup>D</sup> in the compacted shell population (open inner pore).

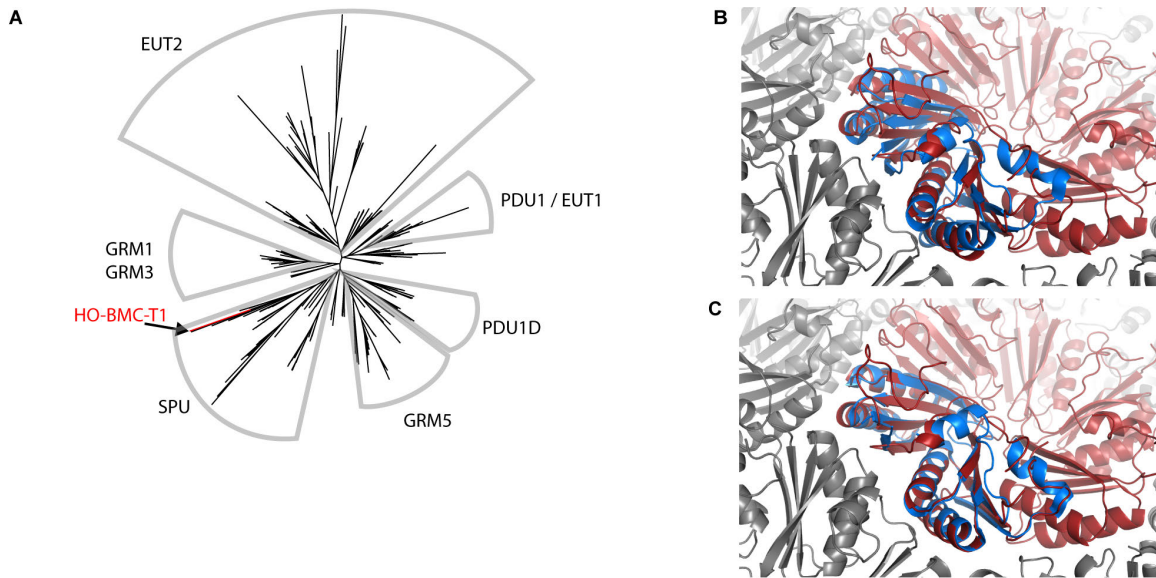

**Fig. S2, related to Fig. 5. Structure and sequence analysis of HO-BMC-T<sup>s</sup>1.**

**(A)** Phylogenetic tree of BMC-T<sup>s</sup> proteins homologous to HO-BMC-T<sup>s</sup>1 with BMC type assignments and highlighted HO-BMC-T<sup>s</sup>1.

**(B)** Comparison of BMC-T<sup>s</sup>1 (red) with BMC-T<sup>s</sup> from *Citrobacter freundii* (PDB ID 3PAC, blue) (Pang et al., 2011) when using a global alignment of the protein chains.

**(C)** Same as A, but aligning the individual domains (residues 2-78 and 79-184 of *C. freundii* BMC-T<sup>s</sup>).

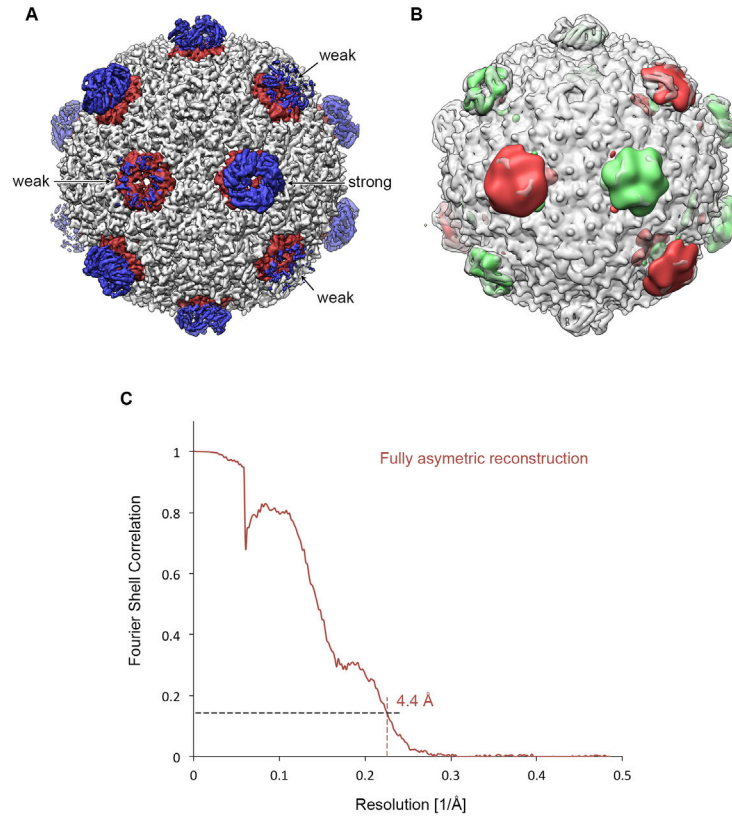

**Fig. S3, related to Fig. 7, STAR Methods. Fully asymmetric reconstruction of the HO BMC shell (main population).**

(A) Cryo-EM map of the BMC shell without use of any symmetry. BMC-T trimers are colored blue (protruding) and brown (embedded). Density for protruding trimers is weak at the indicated positions (arrows).

(B) To highlight variable density in BMC-T rings, a difference density was calculated by subtracting the icosahedrally symmetrized map (grey; containing averaged density for the protruding BMC-T<sup>D</sup> layers) from the asymmetric map. Positive difference density (indicating predominant presence of BMC-T<sup>D</sup>) is shown in green, negative difference density (indicating increased presence of BMC-T<sup>S</sup>) is shown in red (orientation as in A).

(C) FSC curve for the fully asymmetric reconstruction of the HO BMC shell at 4.4 Å resolution (FSC = 0.143 criterion).

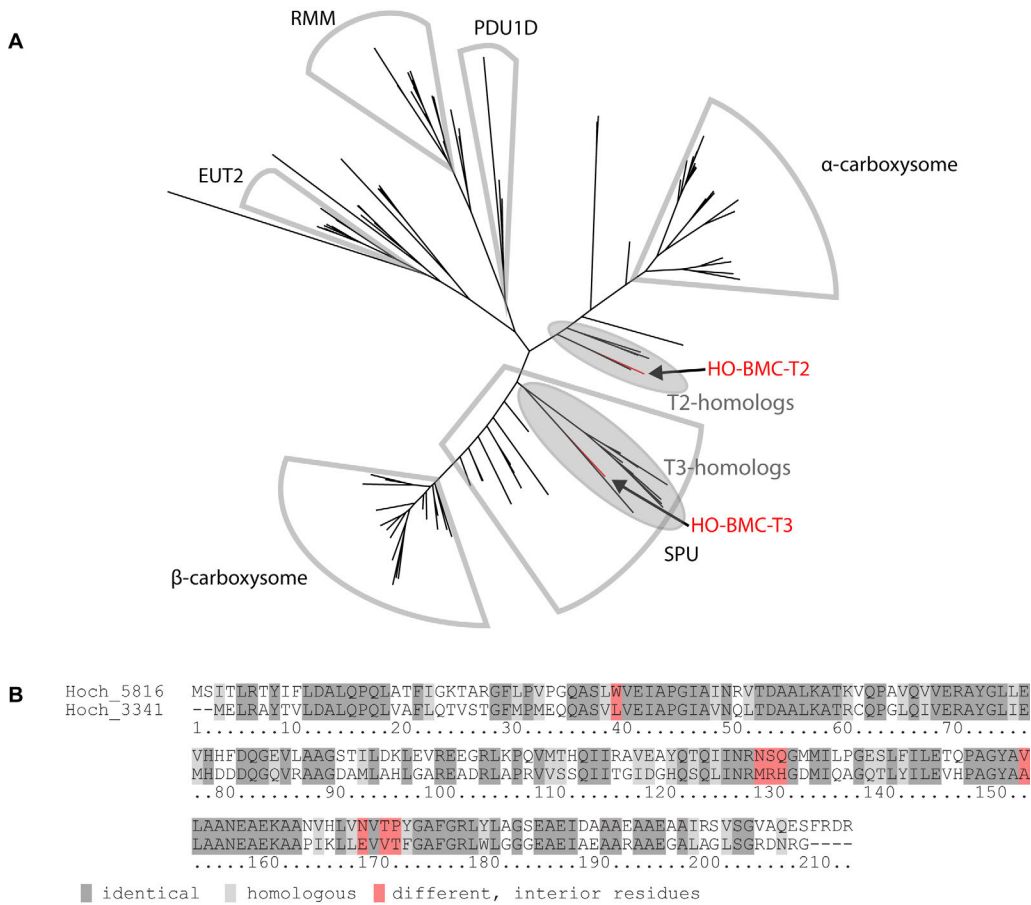

**Fig. S4, related to Fig. 8. Sequence analysis of HO-BMC-T<sup>D2</sup>/T<sup>D3</sup>**

**(A)** Phylogenetic tree of BMC-T<sup>D</sup> proteins with BMC type assignments and highlighted BMC-T<sup>D2</sup> and BMC-T<sup>D3</sup> and their closest homologs (shaded).

**(B)** Sequence alignment of BMC-T<sup>D2</sup> (Hoch-5816) and BMC-T<sup>D3</sup> (Hoch-3341).

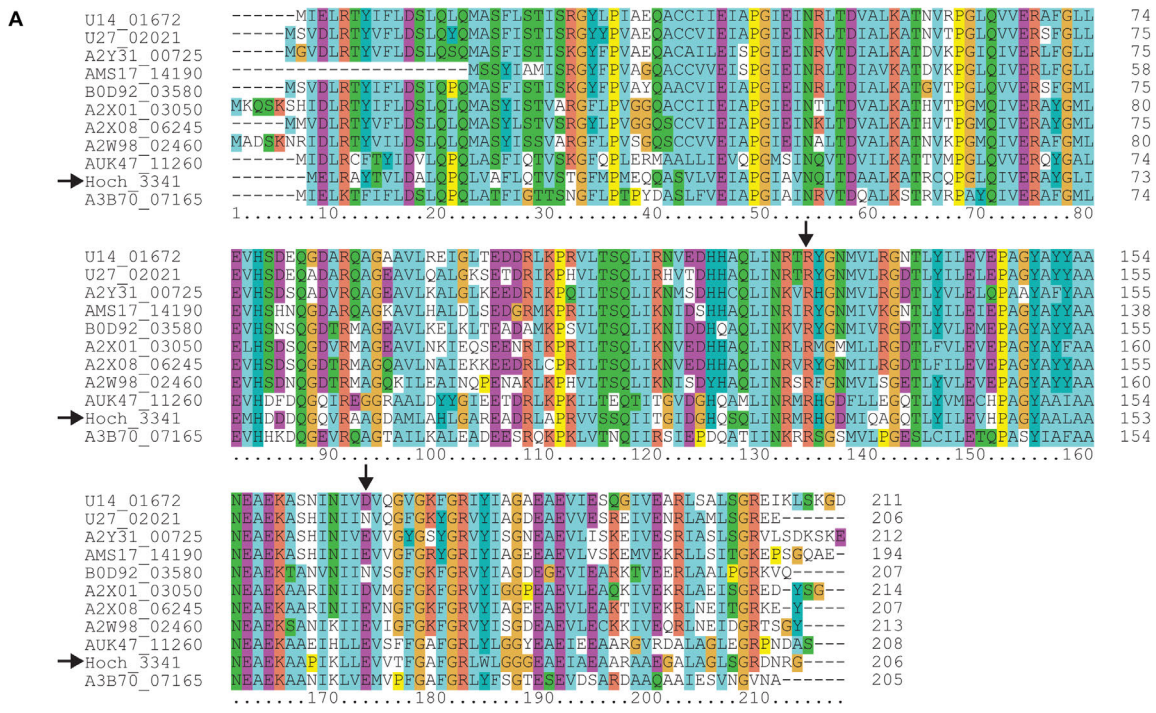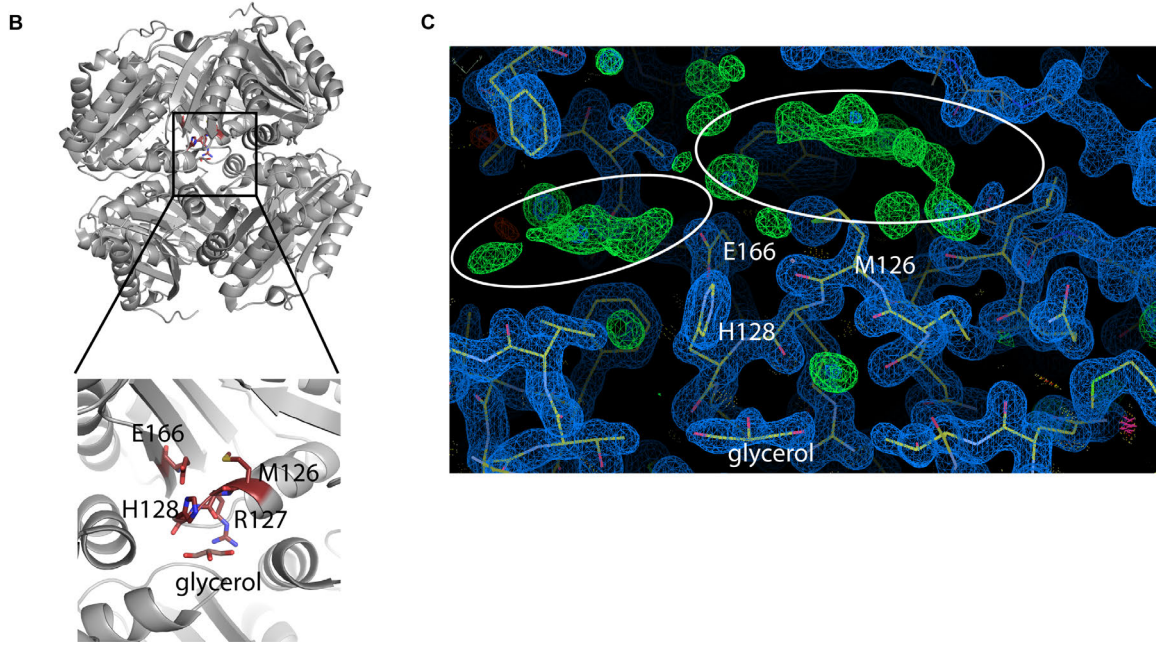

**Fig. S5, related to Fig. 8. Analysis of the interior cavity of BMC-T<sup>D3</sup>.**

(A) Sequence alignment of the 10 homologs of BMC-T<sup>D3</sup> (HO-3341, arrow; as shown in Fig. S4B). Conserved interior residues different from BMC-T<sup>D2</sup> are highlighted with arrows.

(B) Location of the highlighted residues and a glycerol molecule in the structure of BMC-T<sup>D3</sup> shown in overview (left) and close-up view (right).

(C) Additional density visible in the crystal structure of BMC-T3. Green: Polder map (Liebschner et al., 2017) of the shown region at 4 rmsd /  $0.5 \text{ e}^-/\text{A}^3$ , blue: 2Fo-Fc map at 2 rmsd /  $0.92 \text{ e}^-/\text{A}^3$ .



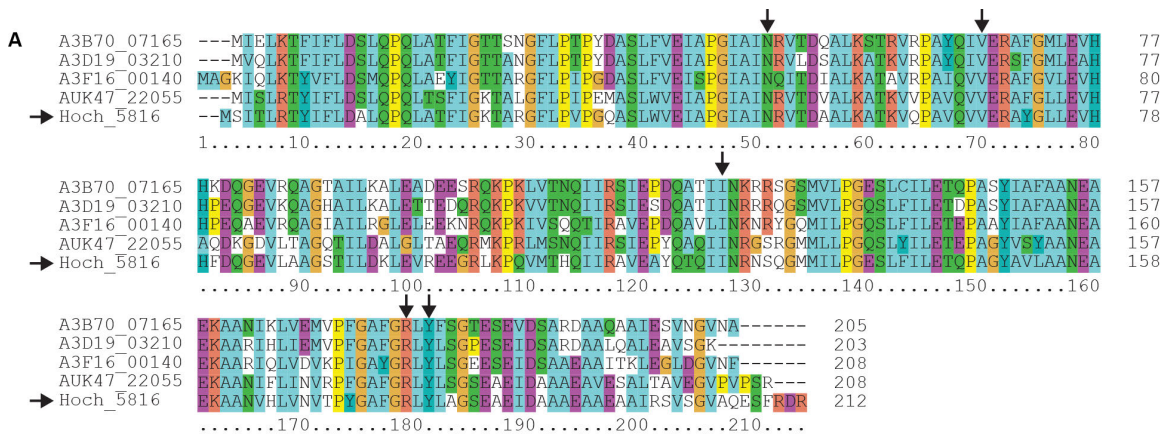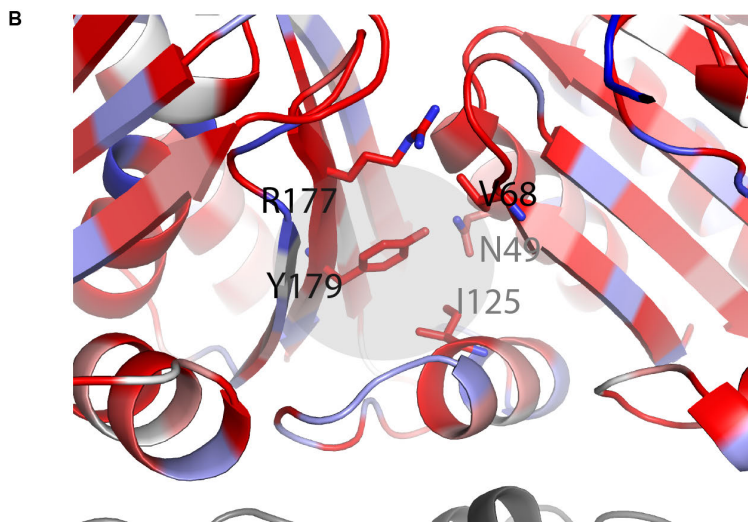

**Fig. S6, related to Fig. 8. Analysis of the interior cavity of BMC-T<sup>D2</sup>.**

(A) Sequence alignment of the closest homologs of BMC-T<sup>D2</sup> (HO-5816, arrow; as shown in Fig. S4B). Coloring by amino acid properties. Conserved interior residues in the pocket between subunits are highlighted with arrows.

(B) Location of the conserved pocket between subunits with highlighted residues, coloring by conservation from low (blue) to high conservation (red).

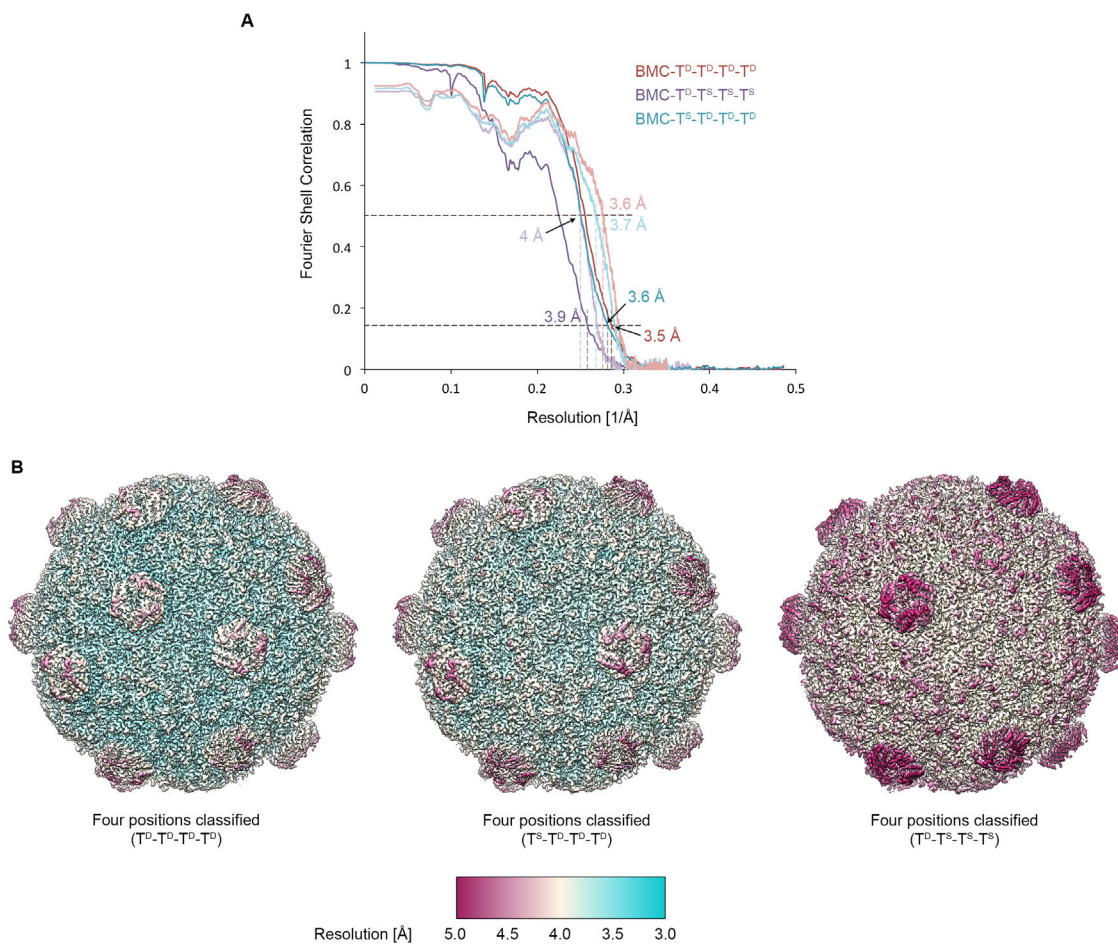

**Fig. S7, related to Fig. 9, STAR Methods. FSC and local resolution plots for the cryo-EM maps classified for BMC-T distribution.**

(A) FSC curves computed from independently refined half-maps (in dark red, blue, and purple) and model vs. map FSC curves (in light red, blue, and purple) for coordinate models refined into the final maps. Resolution estimates are indicated (FSC = 0.143 criterion for FSC curves between half-maps, FSC = 0.5 criterion for model vs. map FSC curves (Rosenthal and Henderson, 2003)).

(B) Final post processed (sharpened) maps of three reconstructions sorted for four neighboring BMC-T positions, colored and filtered according to local resolution.

A

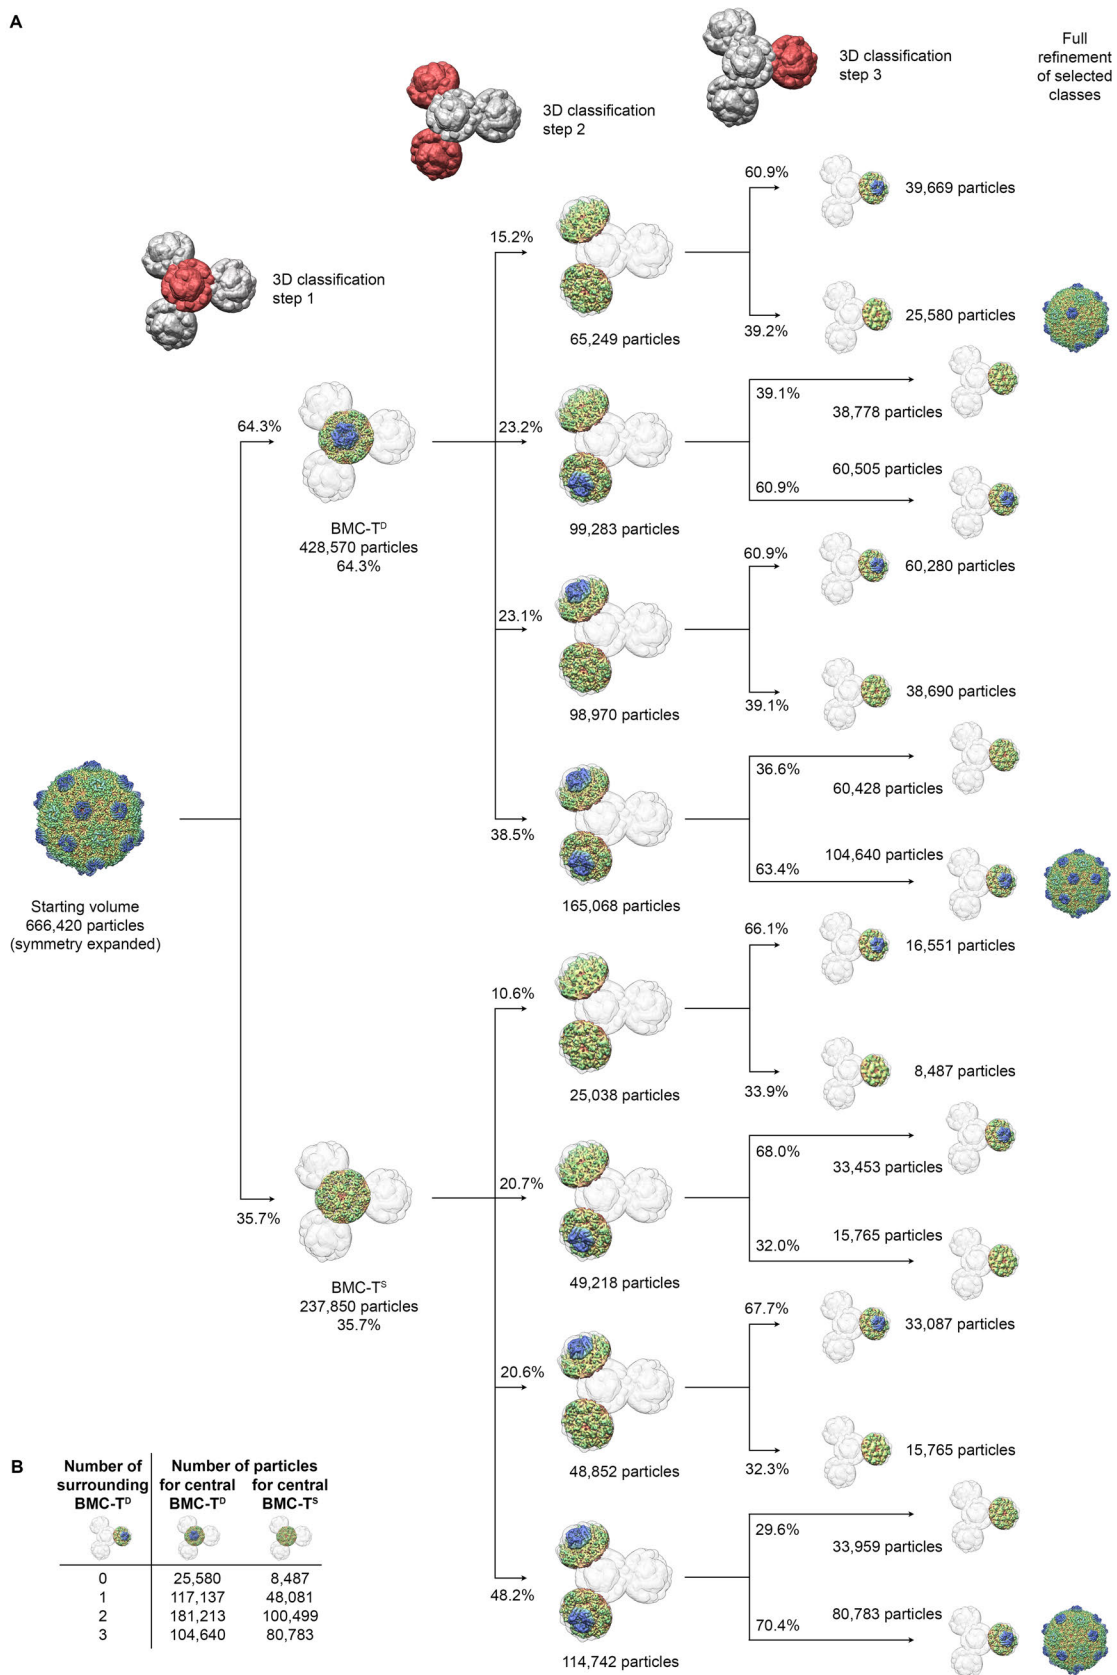

B

| Number of surrounding BMC-T <sup>0</sup> | Number of particles for central BMC-T <sup>0</sup> | Number of particles for central BMC-T <sup>1</sup> |
|------------------------------------------|----------------------------------------------------|----------------------------------------------------|
| 0                                        | 25,580                                             | 8,487                                              |
| 1                                        | 117,137                                            | 48,081                                             |
| 2                                        | 181,213                                            | 100,499                                            |
| 3                                        | 104,640                                            | 80,783                                             |

**Fig. S8 related to Figs. 7, 9, STAR Methods. Classification strategy used for sorting four neighboring BMC-T positions.**

(A) Three consecutive steps of 3D classification were performed to sort an initial 666,400 particle dataset into 16 classes corresponding to all possible combinations of BMC-T<sup>S</sup> and BMC-T<sup>D</sup> at four neighboring positions. The masks used are shown at the top; masks used in each step are shown in red, masks not used in this step are shown in grey. Percentages shown above or below arrows refer to the distribution of particles in that specific classification step (not percentage of total particles). Selected classes were subjected to full 3D refinement. The resulting 3D volumes are shown on the right and are discussed further in the text.

(B) Summary of the distribution of particles resulting from the classification in (A), grouped by the number of peripheral BMC-T<sup>D</sup> building blocks.

**Table S1, related to Figs. 2, 3, 5, 6, 8, 9, S1, S7. Data collection, map and model refinement, model validation.**

|                                                 | Large Shell<br>(main<br>population) | Compacted<br>Shell | BMC-T <sup>S</sup><br>large shell | BMC-T <sup>D</sup><br>large shell<br>closed<br>inside | BMC-T <sup>D</sup><br>large shell<br>widened<br>inside | BMC-T <sup>D</sup><br>small shell<br>open<br>inside | Large shell<br>C1<br>refinement | Four<br>positions:<br>BMC-T <sup>D</sup> T <sup>S</sup> T <sup>S</sup> T <sup>S</sup> | Four<br>positions:<br>BMC-T <sup>D</sup> T <sup>D</sup> T <sup>D</sup> T <sup>D</sup> | Four<br>positions:<br>BMC-T <sup>S</sup> T <sup>D</sup> T <sup>D</sup> T <sup>D</sup> |
|-------------------------------------------------|-------------------------------------|--------------------|-----------------------------------|-------------------------------------------------------|--------------------------------------------------------|-----------------------------------------------------|---------------------------------|---------------------------------------------------------------------------------------|---------------------------------------------------------------------------------------|---------------------------------------------------------------------------------------|
| <b>Accession codes</b>                          |                                     |                    |                                   |                                                       |                                                        |                                                     |                                 |                                                                                       |                                                                                       |                                                                                       |
| Map (EMDB)                                      | EMD-9309                            | EMD-9310           | EMD-9311                          | EMD-9307                                              | EMD-9308                                               | EMD-9312                                            | EMD-9296                        | EMD-9314                                                                              | EMD-9313                                                                              | EMD-9315                                                                              |
| Coordinates (PDB)                               | 6MZX                                | 6MZY               | 6N06                              | 6MZU                                                  | 6MZV                                                   | 6N07                                                | -                               | 6N0F                                                                                  | 6N09                                                                                  | 6N0G                                                                                  |
| <b>Data collection</b>                          |                                     |                    |                                   |                                                       |                                                        |                                                     |                                 |                                                                                       |                                                                                       |                                                                                       |
| Microscope                                      | FEI Titan low-base                  |                    |                                   |                                                       |                                                        |                                                     |                                 |                                                                                       |                                                                                       |                                                                                       |
| Voltage (kV)                                    | 300                                 |                    |                                   |                                                       |                                                        |                                                     |                                 |                                                                                       |                                                                                       |                                                                                       |
| Detector                                        | Gatan K2 Summit                     |                    |                                   |                                                       |                                                        |                                                     |                                 |                                                                                       |                                                                                       |                                                                                       |
| Pixel size (Å)                                  | 1.03                                |                    |                                   |                                                       |                                                        |                                                     |                                 |                                                                                       |                                                                                       |                                                                                       |
| Defocus range (µm)                              | 1.5-3.0                             |                    |                                   |                                                       |                                                        |                                                     |                                 |                                                                                       |                                                                                       |                                                                                       |
| Electron dose (e <sup>-</sup> /Å <sup>2</sup> ) | 25                                  |                    |                                   |                                                       |                                                        |                                                     |                                 |                                                                                       |                                                                                       |                                                                                       |
| <b>Reconstruction</b>                           |                                     |                    |                                   |                                                       |                                                        |                                                     |                                 |                                                                                       |                                                                                       |                                                                                       |
| Software                                        | FREALIGN                            | FREALIGN           | RELION                            | RELION                                                | RELION                                                 | RELION                                              | RELION                          | RELION                                                                                | RELION                                                                                | RELION                                                                                |
| Particles                                       | 15,779                              | 2,276              | 177,642                           | 132,076                                               | 149,628                                                | 83,102                                              | 11,107                          | 25,580                                                                                | 106,640                                                                               | 80,783                                                                                |
| Box size (pixels)                               | 512 <sup>3</sup>                    | 512 <sup>3</sup>   | 512 <sup>3</sup>                  | 512 <sup>3</sup>                                      | 512 <sup>3</sup>                                       | 512 <sup>3</sup>                                    | 512 <sup>3</sup>                | 512 <sup>3</sup>                                                                      | 512 <sup>3</sup>                                                                      | 512 <sup>3</sup>                                                                      |
| Symmetry imposed                                | I2                                  | I2                 | C1                                | C1                                                    | C1                                                     | C1                                                  | C1                              | C1                                                                                    | C1                                                                                    | C1                                                                                    |
| Accuracy rotations (°)                          | 0.14                                | 0.18               | 0.15                              | 0.16                                                  | 0.16                                                   | 0.19                                                | 0.35                            | 0.25                                                                                  | 0.17                                                                                  | 0.18                                                                                  |
| Accuracy translations (pixels)                  | 0.3                                 | 0.4                | 0.3                               | 0.3                                                   | 0.3                                                    | 0.4                                                 | 0.6                             | 0.4                                                                                   | 0.3                                                                                   | 0.3                                                                                   |
| Map resolution (Å)                              | 3.0                                 | 3.3                | 3.4                               | 3.4                                                   | 3.4                                                    | 3.6                                                 | 4.4                             | 3.9                                                                                   | 3.5                                                                                   | 3.6                                                                                   |
| Map sharpening b-factor (Å <sup>2</sup> )       | -150                                | -120               | -130                              | -120                                                  | -115                                                   | -125                                                | -70                             | -120                                                                                  | -120                                                                                  | -120                                                                                  |
| <b>Coordinate refinement</b>                    |                                     |                    |                                   |                                                       |                                                        |                                                     |                                 |                                                                                       |                                                                                       |                                                                                       |
| Software                                        | PHENIX                              | PHENIX             | PHENIX                            | PHENIX                                                | PHENIX                                                 | PHENIX                                              | Not refined                     | PHENIX                                                                                | PHENIX                                                                                | PHENIX                                                                                |
| Resolution cutoff (Å)                           | 3.0                                 | 3.3                | 3.4                               | 3.4                                                   | 3.4                                                    | 3.6                                                 | -                               | 3.9                                                                                   | 3.5                                                                                   | 3.6                                                                                   |
| Resolution (Å, FSC = 0.5)                       | 3.1                                 | 3.4                | 3.4                               | 3.4                                                   | 3.5                                                    | 3.7                                                 | -                               | 4.0                                                                                   | 3.6                                                                                   | 3.7                                                                                   |
| <b>Model</b>                                    |                                     |                    |                                   |                                                       |                                                        |                                                     |                                 |                                                                                       |                                                                                       |                                                                                       |
| Number of residues                              | 1051 <sup>#</sup>                   | 1051 <sup>#</sup>  | 3915                              | 4523                                                  | 4523                                                   | 4523                                                | -                               | 6332                                                                                  | 8162                                                                                  | 7554                                                                                  |
| B-factors overall                               | 37.3                                | 69.9               | 43.0                              | 64.6                                                  | 60.8                                                   | 62.8                                                | -                               | 109.7                                                                                 | 52.1                                                                                  | 69.0                                                                                  |
| R.m.s. deviations                               |                                     |                    |                                   |                                                       |                                                        |                                                     |                                 |                                                                                       |                                                                                       |                                                                                       |
| Bond lengths (Å)                                | 0.009                               | 0.009              | 0.008                             | 0.007                                                 | 0.007                                                  | 0.007                                               | -                               | 0.010                                                                                 | 0.008                                                                                 | 0.009                                                                                 |
| Bond angles (°)                                 | 1.200                               | 1.216              | 1.213                             | 1.141                                                 | 1.130                                                  | 1.149                                               | -                               | 0.975                                                                                 | 0.859                                                                                 | 1.019                                                                                 |

**Table S1 (continued)**

|                               | Large Shell<br>(main<br>population) | Compacted<br>Shell | BMC-T <sup>S</sup><br>large shell | BMC-T <sup>D</sup><br>large shell<br>closed<br>inside | BMC-T <sup>D</sup><br>large shell<br>widened<br>inside | BMC-T <sup>D</sup><br>small shell<br>open<br>inside | Large shell<br>C1<br>refinement | Four<br>positions:<br>BMC-T <sup>D</sup> T <sup>S</sup> T <sup>S</sup> T <sup>S</sup> | Four<br>positions:<br>BMC-T <sup>D</sup> T <sup>D</sup> T <sup>D</sup> T <sup>D</sup> | Four<br>positions:<br>BMC-T <sup>S</sup> T <sup>D</sup> T <sup>D</sup> T <sup>D</sup> |
|-------------------------------|-------------------------------------|--------------------|-----------------------------------|-------------------------------------------------------|--------------------------------------------------------|-----------------------------------------------------|---------------------------------|---------------------------------------------------------------------------------------|---------------------------------------------------------------------------------------|---------------------------------------------------------------------------------------|
| <b>Validation</b>             |                                     |                    |                                   |                                                       |                                                        |                                                     |                                 |                                                                                       |                                                                                       |                                                                                       |
| Molprobrity clashscore        | 5.7                                 | 5.1                | 6.8                               | 6.6                                                   | 7.2                                                    | 5.4                                                 | -                               | 7.6                                                                                   | 6.1                                                                                   | 2.2                                                                                   |
| Rotamer outliers (%)          | 0.0                                 | 0.17               | 0.04                              | 0.03                                                  | 0.34                                                   | 0.06                                                | -                               | 0.3                                                                                   | 0.2                                                                                   | 0.0                                                                                   |
| C <sub>β</sub> deviations (%) | 0.0                                 | 0.0                | 0.0                               | 0.0                                                   | 0.0                                                    | 0.0                                                 | -                               | 0.0                                                                                   | 0.0                                                                                   | 0.0                                                                                   |
| Ramachandran plot             |                                     |                    |                                   |                                                       |                                                        |                                                     |                                 |                                                                                       |                                                                                       |                                                                                       |
| Favored (%)                   | 97.1                                | 95.6               | 97.9                              | 97.5                                                  | 96.8                                                   | 98.0                                                | -                               | 94.8                                                                                  | 96.7                                                                                  | 97.3                                                                                  |
| Allowed (%)                   | 2.9                                 | 4.1                | 2.1                               | 2.5                                                   | 3.2                                                    | 2.0                                                 | -                               | 5.3                                                                                   | 3.3                                                                                   | 2.7                                                                                   |
| Outliers (%)                  | 0.0                                 | 0.0                | 0.0                               | 0.0                                                   | 0.0                                                    | 0.0                                                 | -                               | 0.0                                                                                   | 0.0                                                                                   | 0.0                                                                                   |

# one asymmetric unit
